# Supplementary material for: Low FODMAP Diet and Probiotics in Irritable Bowel Syndrome: A Systematic Review With Network Meta-analysis
Source: PubMed Central journal article supplement (PMC8959572; doi:10.3389/fphar.2022.853011), 2022-03-09
Supplement: Table1.pdf [file Table1.pdf]

**Supplementary Table 1. Study characteristics**

| Author (year)             | Design                         | Sample size (% female, mean age) | Participants                                              | Interventions                                                                                                                                                                                                          | Outcomes                                                             |
|---------------------------|--------------------------------|----------------------------------|-----------------------------------------------------------|------------------------------------------------------------------------------------------------------------------------------------------------------------------------------------------------------------------------|----------------------------------------------------------------------|
| 1. Combination            |                                |                                  |                                                           |                                                                                                                                                                                                                        |                                                                      |
| Kim, (2003)               | USA RCT, Single-center         | 25 (72,42.8)                     | Rome II, 100% IBS-D                                       | Combination VSL#3 (225 billion bacteria/packet) bid for 8 weeks                                                                                                                                                        | SR of IBS symptoms for 50% of weeks                                  |
| Kim, (2005)               | USA RCT, Single-center         | 48 (93.8,43)                     | Rome II, 42 % IBS-D, 33% IBS-C, 25% IBS-M                 | Combination VSL#3 bid (31 patients for 4 weeks and 17 patients for 8 weeks)                                                                                                                                            | SR of IBS symptoms for 50% of weeks                                  |
| Kajander, (2005)          | Finland RCT, Single-center     | 103 (76.5,45.5)                  | Rome I and II, 47.6% IBS-D, 23.3% IBS-C, 29.1% IBS-M      | Combination LGG, LR LC705, <i>Propionibacterium Free-denreichii</i> , and <i>B. breve</i> Bb99 (8-9×10 <sup>9</sup> cfu/capsule) for 6 months                                                                          | Relief of global symptom score                                       |
| Kim, (2006)               | Korea RCT, Single-center       | 40 (26.5,39.4)                   | Rome II, 70 % IBS-D, 30% IBS-M                            | Combination <i>Bacillus subtilis</i> (1×10 <sup>9</sup> ), <i>S. faecium</i> (9×10 <sup>9</sup> ) tid for 4 weeks.                                                                                                     | Abdominal pain                                                       |
| Guyonnet, (2007)          | France RCT, Thirty-five-center | 274 (74.5,49.3)                  | Rome II, 100% IBS-C                                       | Combination <i>B. animalis</i> DN 173010 (1.25×10 <sup>10</sup> cfu/125g), <i>ST</i> (1.2×10 <sup>9</sup> cfu/125g) and <i>L. bulgaricus</i> (1.2×10 <sup>9</sup> cfu/125g) bid for 6 weeks                            | Improvement at least 10% discomfort dimension score, adverse events  |
| Zeng, (2008)              | China RRCT, Single-center      | 30 (34.5,45.2)                   | Rome II, 100% IBS-D                                       | Combination <i>ST</i> (1×10 <sup>8</sup> cfu/ml), <i>L. bulgaricus</i> (1×10 <sup>7</sup> cfu/ml), <i>LA'</i> (1×10 <sup>7</sup> cfu/ml), and <i>BL</i> (1×10 <sup>7</sup> cfu/ml) 200ml bid for 4 weeks               | Global IBS scores in GSRS                                            |
| Kajander, (2008)          | Finland RCT, Single-center     | 86 (93,48)                       | Rome II, 45% IBS-D, 25% IBS-C, 30% IBS-M                  | Combination LGG ATCC 53103, LGG, LR Lc705 DSM 7061, <i>P. freudenreichii ssp. Shermanii JS</i> DSM 7067 and <i>B. animalis ssp. lactis</i> Bb12 DSM 15954 (1×10 <sup>7</sup> cfu/ml) 1.2dl qd for 14 weeks             | Global IBS symptoms score, adverse events                            |
| Enck, (2008)              | Germany RCT, Ten-center        | 297 (73.5,49.6)                  | Clinical criteria, IBS-D, IBS-C, IBS-M                    | Combination <i>Enterococcus faecalis</i> DSM 16440 and <i>Escherichia coli</i> DSM 17252 (3.0-9.0×10 <sup>7</sup> cfu/1.5ml) ×0.75ml tid for 1 week, then 1.5 ml tid for weeks 2 and 3, then 2.25 ml tid for weeks 3–8 | Have at least a 50% decrease in global symptom score, adverse events |
| Drouault-Holowacz, (2008) | France RCT, Single-center      | 106 (76,45.4)                    | Rome II, 29% IBS-D, 29% IBS-C, 41% IBS-M, 1% IBS-U        | Combination <i>BL LA'</i> 101 (29%), <i>Lb. acidophilus LA'</i> 102 (29%), <i>L. lactis LA'</i> 103 (29%) and <i>S. thermo-philus LA'</i> 104 (13%) 1×10 <sup>10</sup> cfu for 4 weeks                                 | SR of overall IBS symptoms                                           |
| Williams, (2009)          | UK RCT, Single-center          | 56 (86.5,39)                     | Rome II, 11.5% IBS-D, 27% IBS-C, 61.5% IBS-M              | Combination <i>LA'</i> CUL-60 NCIMB 30157 and CUL-21 NCIMB 30156, <i>BB</i> CUL-20 NCIMB 30153, and <i>BL'</i> CUL-34 NCIMB 30172 (2.5×10 <sup>10</sup> cfu/capsule) for 8 weeks                                       | IBS-SSS                                                              |
| Hong, (2009)              | Korea RCT, Single-center       | 70 (32.9,37)                     | Rome III, 45.7% IBS-D, 20% IBS-C, 8.5% IBS-M, 25.8% IBS-U | Combination <i>BB</i> BGN4, <i>BL'</i> AD011, <i>L. acidophil</i> AD031, and <i>LC</i> IBS041 (20 Billi bacteria/sachet) bid for 8 weeks                                                                               | Reduction of symptom score by at least 50%, adverse events           |
| Simren,                   | Sweden RCT,                    | 74                               | Rome II,                                                  | Combination                                                                                                                                                                                                            | AR of IBS symptoms                                                   |

|                               |                                   |                    |                                                                         |                                                                                                                                                                                                                                                                  |                                                            |
|-------------------------------|-----------------------------------|--------------------|-------------------------------------------------------------------------|------------------------------------------------------------------------------------------------------------------------------------------------------------------------------------------------------------------------------------------------------------------|------------------------------------------------------------|
| (2010)                        | Single-center                     | (70.3,43)          | 35.1% IBS-D,<br>14.9% IBS-C,<br>50% IBS-M                               | <i>LP ssp paracasei</i> F1 P9, <i>LA'5</i> ,<br>and <i>BL' Bb</i> 12 200ml ( $5 \times 10^7$<br>cfu/ml) bid for 8 weeks                                                                                                                                          | at least 50%                                               |
| Sondergaard,<br>(2011)        | Sweden RCT,<br>Two-center         | 64<br>(75,51.2)    | Rome II,<br>Subtype not<br>reported                                     | Combination<br><i>LP ssp paracasei</i> F19, <i>LA'5</i> and<br><i>BL' Bb</i> 12 ( $5 \times 10^7$ cfu/ml) for 8<br>weeks                                                                                                                                         | AR of IBS symptoms                                         |
| Michail,<br>(2011)            | USA RCT,<br>Single-center         | 24<br>(66.7,21.8)  | Rome III,<br>100% IBS-D                                                 | Combination<br>VSL#3 (900 billion<br>bacteria/packet) qd for 8 weeks                                                                                                                                                                                             | Global symptoms<br>score (a clinical rating<br>scale GSRS) |
| Cui,<br>(2012)                | China RCT,<br>Single-center       | 60<br>(70,44.7)    | Rome III,<br>48.3% IBS-D,<br>30% IBS-C,<br>11.7% IBS-M,<br>10% IBS-U    | Combination<br><i>BL</i> and <i>LA'</i> tid for 4 weeks                                                                                                                                                                                                          | Improvement in IBS<br>symptoms                             |
| Cha,<br>(2012)                | Korea RCT,<br>Single-center       | 50<br>(48,39.7)    | Rome III,<br>100% IBS-D                                                 | Combination<br><i>LA'</i> , <i>LP'</i> , <i>LR</i> , <i>B. breve</i> , <i>BL'</i> , <i>BL</i> ,<br>and <i>ST</i> ( $0.5 \times 10^{10}$ cfu/capsule) bid<br>for 8 weeks                                                                                          | AR of IBS symptoms<br>at least 50% of the<br>weeks         |
| Ko,<br>(2013)                 | Korea RCT,<br>Single-center       | 26<br>(63.3,37.3)  | Rome III,<br>100% IBS-D                                                 | Combination<br><i>B. brevis</i> , <i>BL'</i> , and <i>BL</i> , <i>LA'</i> , <i>LP'</i> ,<br>and <i>LR</i> , and <i>ST</i> (5 billion<br>bacteria/capsule) tid for 8 weeks                                                                                        | AR of overall IBS<br>symptoms                              |
| Begtrup,<br>(2013)            | Denmark RCT,<br>Single-center     | 131<br>(30,30.5)   | Rome III,<br>40.5% IBS-D,<br>19.1% IBS-C,<br>38.2% IBS-M,<br>2.2% IBS-U | Combination<br><i>LP ssp paracasei</i> F19, <i>LA'5</i> , and<br><i>BL' Bb</i> 124 capsules ( $1.3 \times 10^{10}$<br>cfu/capsule) for 6 months                                                                                                                  | AR of global IBS<br>symptoms                               |
| Roberts,<br>(2013)            | UK RCT,<br>Thirteen-center        | 179<br>(85,44.2)   | Rome III,<br>100% IBS-C or<br>IBS-M                                     | Combination<br><i>BL' I-2494</i> (previously known as<br>DN1 73010) ( $1.25 \times 10^{10}$ cfu/pot),<br><i>ST I-1630</i> ( $1.2 \times 10^9$ cfu/pot), and<br><i>L. bulgaricus I-1632</i> and <i>I-1519</i><br>( $1.2 \times 10^9$ cfu/pot) bid for 12<br>weeks | Subjective global<br>assessment of<br>symptom relief       |
| Sisson,<br>(2014)             | UK RCT,<br>Single-center          | 186<br>(69.4,38.3) | Rome III,<br>37.6% IBS-D,<br>21.5% IBS-C,<br>35.5% IBS-M,<br>5.4% IBS-U | Combination<br><i>LR</i> NCIMB 30174, <i>LP'</i> NCIMB<br>30173, <i>LA'</i> NCIMB 30175 and<br><i>Enterococcus faecium</i> NCIMB<br>30176 ( $1 \times 10^{10}$ cfu/50ml) for 12<br>weeks                                                                         | IBS-SSS, adverse<br>events                                 |
| Ludidi,<br>(2014)             | Netherlands RCT,<br>Single-center | 40<br>(67.5,40.5)  | Rome III,<br>42.5% IBS-D,<br>10% IBS-C,<br>30% IBS-M,<br>17.5% IBS-U    | Combination<br><i>BL' W52</i> , <i>LC W56</i> , <i>L. salivarius</i><br><i>W57</i> , <i>L. W58</i> , <i>LA' NCFM</i> , and <i>LR</i><br><i>W71</i> ( $5 \times 10^9$ cfu/sachet) for 6<br>weeks                                                                  | Mean symptom<br>composite score                            |
| Lorenzo-<br>Zuniga,<br>(2014) | Spain RCT,<br>Two-center          | 84<br>(63.1,46.8)  | Rome III,<br>100% IBS-D                                                 | Combination<br><i>LP' CECT7484</i> and <i>CECT7485</i><br>and one <i>Pediococcus acidilactici</i><br><i>CECT7483</i> (high dose: $1-3 \times 10^{10}$<br>cfu/capsule or high dose: $3-6 \times 10^9$<br>cfu/capsule qd for 6 weeks                               | Relief of IBS<br>symptoms                                  |
| Jafari,<br>(2014)             | Iran RCT,<br>Single-center        | 108<br>(60.2,36.7) | Rome III,<br>Subtype not<br>reported                                    | Combination<br><i>B. animalis subsp. lactis</i> BB-12®,<br><i>LA-5</i> ®, <i>L. delbrueckii subsp.</i><br><i>bulgaricus</i> LBY-27, <i>ST STY-31</i><br>( $4 \times 10^8$ cfu/capsule) bid for 4<br>weeks                                                        | Relief of IBS<br>symptoms                                  |
| Yoon,<br>(2014)               | Korea RCT,<br>Single-center       | 49<br>(65.3,44.5)  | Rome III,<br>53.1% IBS-D,<br>40.8% IBS-C,<br>6.1% IBS-M                 | Combination<br><i>BB</i> KCTC 12199BP, <i>BL' KCTC</i><br>11904BP, <i>BL</i> KCTC 12200BP,<br><i>LA' KCTC</i> 11906BP, <i>LR</i> KCTC<br>12202BP and <i>ST</i> KCTC 11870BP.<br>( $5 \times 10^9$ viable cells/capsule) bid<br>for 4 weeks                       | Global relief of IBS<br>Symptoms                           |
| Yoon,                         | Korea RCT,                        | 81                 | Rome III,                                                               | Combination                                                                                                                                                                                                                                                      | AR of overall IBS                                          |

|                             |                              |                 |                                                           |                                                                                                                                                                                                                                                                                                                                                                                                                                                                                                                                                                                                              |                                              |
|-----------------------------|------------------------------|-----------------|-----------------------------------------------------------|--------------------------------------------------------------------------------------------------------------------------------------------------------------------------------------------------------------------------------------------------------------------------------------------------------------------------------------------------------------------------------------------------------------------------------------------------------------------------------------------------------------------------------------------------------------------------------------------------------------|----------------------------------------------|
| (2015)                      | Single-center                | (46.3,59.3)     | 48.1% IBS-D,<br>18.5% IBS-C,<br>21% IBS-M,<br>12.4% IBS-U | <i>BB</i> KCTC 12199BP, <i>BL</i> ' KCTC 11904BP, <i>BL</i> KCTC 12200BP, <i>LA</i> ' KCTC 11906BP, <i>LR</i> KCTC 12202BP, and <i>ST</i> KCTC 11870BP (5×10 <sup>9</sup> viable cells/capsule) bid for 4 weeks                                                                                                                                                                                                                                                                                                                                                                                              | symptoms                                     |
| Wong, (2015)                | Singapore RCT, Single-center | 42 (45.2,47)    | Rome III, IBS-M                                           | Combination VSL#3 (225 billion bacteria/capsule) bid for 6 weeks                                                                                                                                                                                                                                                                                                                                                                                                                                                                                                                                             | Overall IBS symptom scores                   |
| Hod, (2017)                 | Israel RCT, Single-center    | 107 (100,29.5)  | Rome III, 100% IBS-D                                      | Combination <i>LR5</i> (3×10 <sup>9</sup> cfu/capsule), <i>LC5</i> (2×10 <sup>9</sup> cfu/capsule), <i>LPC5</i> (1×10 <sup>9</sup> cfu/capsule), <i>LP'3</i> (1×10 <sup>9</sup> cfu/capsule), <i>LA'1</i> (5×10 <sup>9</sup> cfu/capsule), <i>B. bifidum</i> BF3 (4×10 <sup>9</sup> cfu/capsule), <i>BL</i> BG7 (1×10 <sup>9</sup> cfu/capsule), <i>B. breve</i> BR3 (2×10 <sup>9</sup> cfu/capsule), <i>BI</i> BT1 (1×10 <sup>9</sup> cfu/capsule), <i>ST3</i> (2×10 <sup>9</sup> cfu/capsule), <i>L. bulgaricus</i> LG1, and <i>Lactococcus lactis</i> SL6 (3×10 <sup>9</sup> cfu/capsule) bid for 8 weeks | Abdominal pain, overall responder rates      |
| Kim, (2020)                 | Korea RCT, Single-center     | 63 (74.6,36)    | Rome II, 100% IBS-D                                       | Combination <i>BL</i> BORI, <i>BB</i> BGN4, <i>BL</i> ' AD011, <i>BI</i> IBS007, and <i>LA</i> ' AD031 (5×10 <sup>9</sup> viable cells/capsule) tid for 8 weeks                                                                                                                                                                                                                                                                                                                                                                                                                                              | Relief of IBS symptoms                       |
| Barraza-Ortiz, (2020)       | México RCT, Single-center    | 36 (61.5,45.6)  | Rome IV, 55.5% IBS-D, 44.5% IBS-M                         | Combination <i>LP</i> ' CECT 7484, <i>LP</i> ' CECT 7485 and <i>Pediococcus acidilactici</i> CECT 7483 (3×10 <sup>9</sup> cfu/capsule) once daily for 6 weeks                                                                                                                                                                                                                                                                                                                                                                                                                                                | Relief of abdominal pain                     |
| Skrzydło-Radomański, (2021) | Poland RCT, Single-center    | 51 (64.5,43.1)  | Rome III, 100% IBS-D                                      | Combination <i>Bifidobacterium breve</i> , <i>BL</i> , <i>BB</i> , <i>BL</i> ', <i>LR</i> , <i>LP</i> , <i>LA</i> ', <i>LC</i> , <i>LP</i> ', and <i>ST</i> (2.08×10 <sup>8</sup> cfu/capsule) po bid for 8 weeks                                                                                                                                                                                                                                                                                                                                                                                            | IBS-SSS                                      |
| <b>2. Lactobacillus</b>     |                              |                 |                                                           |                                                                                                                                                                                                                                                                                                                                                                                                                                                                                                                                                                                                              |                                              |
| Nobaek, (2000)              | Sweden RCT, Single-center    | 60 (69.2,48.5)  | Rome criteria, IBS-D, IBS-C                               | <i>Lactobacillus LP</i> ' DSM 9843 (5×10 <sup>7</sup> cfu/ml/drink), 400ml qd for 4 weeks                                                                                                                                                                                                                                                                                                                                                                                                                                                                                                                    | Significant improvements in the IBS symptoms |
| Niedzielin, (2001)          | Poland RCT, Single-center    | 40 (80,43.5)    | Clinical diagnosis, 2.5% IBS-D, 52.5% IBS-C, 45% IBS-M    | <i>Lactobacillus LP</i> ' 299V (5×10 <sup>7</sup> cfu/ml) bid for 4 weeks                                                                                                                                                                                                                                                                                                                                                                                                                                                                                                                                    | Improvement in global IBS                    |
| Niv, (2005)                 | Israel RCT, Two-center       | 54 (66.7,45.7)  | Rome II, 37% IBS-D, 18.5% IBS-C, 44.4% IBS-M              | <i>Lactobacillus L. reuteri</i> ATCC 55730 (1×10 <sup>8</sup> colony-forming units/table), qd for 1 week, then bid a week                                                                                                                                                                                                                                                                                                                                                                                                                                                                                    | Global symptoms score, adverse events        |
| Sinn, (2008)                | Korea RCT, Single-center     | 40 (65,44.7)    | Rome III, 10% IBS-D, 27.5% IBS-C, 62.5% IBS-M             | <i>Lactobacillus LA</i> ' SDC 2012 and 2013 (2×10 <sup>9</sup> cfu/ml) bid for 4 weeks                                                                                                                                                                                                                                                                                                                                                                                                                                                                                                                       | Reduction in abdominal pain score            |
| Farup, (2012)               | Norway RCT, Single-center    | 16 (69,50)      | Rome II, 37.5% IBS-D, 6.25% IBS-C, 56.25% IBS-M           | <i>Lactobacillus LP</i> ' MF 1298 (1×10 <sup>10</sup> cfu/capsule) qd for 6 weeks                                                                                                                                                                                                                                                                                                                                                                                                                                                                                                                            | Global symptoms score                        |
| Ducrotte, (2012)            | France RCT, Four-center      | 214 (29.4,37.3) | Rome III, 62% IBS-D, 38% non-classified                   | <i>Lactobacillus LP</i> ' 299V DSM 9843 (10 billion cfu/capsule) for 4 weeks                                                                                                                                                                                                                                                                                                                                                                                                                                                                                                                                 | Relief of IBS symptoms, adverse events       |
| Dapigny,                    | France RCT,                  | 52              | Rome III,                                                 | <i>Lactobacillus</i>                                                                                                                                                                                                                                                                                                                                                                                                                                                                                                                                                                                         | IBS severity score                           |

|                       |                                       |                    |                                                                       |                                                                                                                                                                |                                                        |
|-----------------------|---------------------------------------|--------------------|-----------------------------------------------------------------------|----------------------------------------------------------------------------------------------------------------------------------------------------------------|--------------------------------------------------------|
| (2012)                | Four-center                           | (70,47.1)          | 30% IBS-D,<br>22% IBS-C,<br>34% IBS-M,<br>14% IBS-U                   | <i>LCR35</i> ( $2 \times 10^8$ cfu/capsule)<br>250mg tid for 4 weeks                                                                                           | reduced by at least<br>50%                             |
| Murakami,<br>(2012)   | Japan RCT,<br>Single- center          | 35<br>(56.5,16.2)  | Rome III,<br>Subtype not<br>reported                                  | <i>Lactobacillus</i><br><i>L. brevis</i> KB290 ( $\geq 1.0 \times 10^{10}$<br>cfu/capsule) 1 capsule/day for 4<br>weeks                                        | IBS symptoms scores                                    |
| Pedersen,<br>(2014)   | Denmark RCT,<br>Single- center        | 123<br>(73.2,37.3) | Rome III,<br>40.7% IBS-D,<br>15.4% IBS-C<br>38.2% IBS-M               | <i>Lactobacillus</i> , Low FODMAPs<br>diet<br><i>LGG</i> or Low FODMAPs diet bid<br>for 6 weeks                                                                | Reduction of IBS-<br>SSS                               |
| Stevenson,<br>(2014)  | South Africa<br>RCT,<br>Single-center | 81<br>(97.5,47.9)  | Rome III,<br>37.6% IBS-D,<br>21.5% IBS-C                              | <i>Lactobacillus</i><br><i>LP' 299v</i> ( $5 \times 10^9$ cfu/capsule)<br>for 8 weeks                                                                          | IBS-SSS, adverse<br>events                             |
| Thijssen,<br>(2016)   | Holland RCT,<br>Four-center           | 80<br>(68.8,41.8)  | Rome II,<br>30% IBS-D,<br>25% IBS-C,<br>28.75% IBS-M,<br>16.25% IBS-U | <i>Lactobacillus</i><br><i>LcS</i> ( $6.5 \times 10^9$ cfu/bottle) bid for<br>for 8 weeks                                                                      | A MSS decrease of at<br>least 30%                      |
| Lyra,<br>(2016)       | Finland RCT,<br>Two-center            | 391<br>(74.7,47.9) | Rome III,<br>38.9% IBS-D,<br>16.6% IBS-C,<br>44% IBS-M,<br>0.5% IBS-U | <i>Lactobacillus</i><br><i>LA' NCFM</i> (ATCC 700396) (low<br>dose: $1 \times 10^9$ cfu/capsule, high<br>dose: $1 \times 10^{10}$ cfu/capsule) for 12<br>weeks | IBS-SSS, adverse<br>events                             |
| Shin,<br>(2018)       | Korea RCT,<br>Single- center          | 60<br>(56.9,36.5)  | Rome III,<br>100% IBS-D,                                              | <i>Lactobacillus</i><br><i>L. gasseri</i> BNR17 ( $1 \times 10^{10}$<br>cfu/day) bid for 8 weeks                                                               | Relief of IBS<br>symptoms                              |
| Oh,<br>(2019)         | Korea RCT,<br>Single-center           | 55<br>(72,32.8)    | Rome III,<br>42% IBS-D,<br>20% IBS-M,<br>38% IBS-U                    | <i>Lactobacillus</i><br><i>LP, L. salivarius, and LP'</i> , ( $1 \times 10^9$<br>cfu/mL) qd for 4 weeks                                                        | Relief of IBS<br>Symptoms                              |
| Sadrin,<br>(2020)     | France RCT,<br>Multi-center           | 80<br>(71,48.9)    | Rome III,<br>Subtype not<br>reported                                  | <i>Lactobacillus</i><br><i>LA' NCFM</i> and <i>LA'</i> subsp.<br><i>Helveticus LA' FTIL 10</i> ( $5 \times 10^9$<br>cfu/capsule) bid for 8 weeks               | Relief of IBS<br>symptoms score,<br>adverse events     |
| Lewis,<br>(2020)      | Canada RCT,<br>Single-center          | 285<br>(77.7,42)   | Rome III,<br>15.1% IBS-D,<br>11.2% IBS-C,<br>73.7% IBS-M              | <i>Lactobacillus/Bifidobacterium</i><br><i>LP HA-196</i> or <i>BL R0175</i> ( $10 \times 10^9$<br>cfu/capsule) qd for 8 weeks.                                 | IBS-SSS, adverse<br>events                             |
| Martoni,<br>(2020)    | USA RCT,<br>Twelve-center             | 336<br>(49.5,39.5) | Rome III,<br>Subtype not<br>reported                                  | <i>Lactobacillus/Bifidobacterium</i><br><i>LA' DDS-1</i> or <i>BL' UABla-12</i><br>( $1 \times 10^{10}$ cfu/capsule) qd for 6<br>weeks                         | Relief of IBS<br>symptoms score                        |
| 3. Low FODMAPs diet   |                                       |                    |                                                                       |                                                                                                                                                                |                                                        |
| Staudacher,<br>(2012) | UK RCT,<br>Single-center              | 41<br>(65.8,35.5)  | Rome III,<br>100% IBS-D                                               | Low FODMAPs diet<br>Low FODMAPs diet for 4 weeks                                                                                                               | Adequate control of<br>IBS symptoms,<br>adverse events |
| Pedersen,<br>(2014)   | Denmark RCT,<br>Single- center        | 123<br>(73.2,37.3) | Rome III,<br>40.7% IBS-D,<br>15.4% IBS-C<br>38.2% IBS-M               | Low FODMAPs diet,<br><i>Lactobacillus</i><br>Low FODMAPs diet or <i>LGG</i> bid<br>for 6 weeks                                                                 | Reduction of IBS-<br>SSS                               |
| Böhn,<br>(2015)       | Sweden RCT,<br>Three- center          | 75<br>(81.3,42.5)  | Rome III,<br>24% IBS-D,<br>29.3% IBS-C,<br>46.7% IBS-M/U              | Low FODMAPs diet<br>Low FODMAPs diet for 4<br>weeks                                                                                                            | Reduction in IBS<br>severity scores $\geq 50$          |
| Chumpitazi,<br>(2015) | USA RCT,<br>Single- center            | 33<br>(67,11.5)    | Rome III,<br>9.1% IBS-D,<br>72.7% IBS-C,<br>9.1% IBS-M,<br>9.1% IBS-U | Low FODMAPs diet<br>Low FODMAPs diet for 2 weeks                                                                                                               | Abdominal pain<br>frequency                            |
| Eswaran,<br>(2016)    | US RCT,<br>Single-center              | 92<br>(70.7,41.7)  | Rome III,<br>100% IBS-D                                               | Low FODMAPs diet<br>Low FODMAPs diet for 4 weeks                                                                                                               | AR of IBS-D<br>symptoms $\geq 50\%$                    |
| McIntosh,<br>(2017)   | Canadian RCT,<br>Single- center       | 40<br>(86.4,50.9)  | Rome III,<br>25% IBS-D,<br>5% IBS-C,                                  | Low FODMAPs diet<br>Low FODMAPs diet for 3 weeks                                                                                                               | IBS symptom<br>reduction $\geq 50$                     |

|                                   |                                |                    |                                                                       |                                                                                                                                                                                             |                                                             |
|-----------------------------------|--------------------------------|--------------------|-----------------------------------------------------------------------|---------------------------------------------------------------------------------------------------------------------------------------------------------------------------------------------|-------------------------------------------------------------|
|                                   |                                |                    | 57.5% IBS-M,<br>2.5% IBS-U                                            |                                                                                                                                                                                             |                                                             |
| Staudacher,<br>(2017)             | UK RCT,<br>Two-center          | 104<br>(67.5,35.5) | Rome III,<br>66.3% IBS-D,<br>23.1% IBS-M,<br>10.6% IBS-U              | Low FODMAPs diet<br>Low FODMAPs diet/ placebo or<br>low FODMAPs diet/ probiotic<br>(VSL#3) for 4 weeks                                                                                      | AR of IBS symptoms,<br>adverse events                       |
| Patcharatrakul,<br>(2019)         | Thailand RCT,<br>Single-center | 66<br>(75.8,51)    | Rome III,<br>100% IBS-C                                               | Low FODMAPs diet<br>Structural individual low<br>FODMAPs dietary advice for 4<br>weeks                                                                                                      | Relief of abdominal<br>pain                                 |
| Darvishmoghadam,<br>(2019)        | Iran RCT,<br>Single-center     | 50<br>(58,30.1)    | Rome IV,<br>100% IBS-D                                                | Low FODMAPs diet<br>Low FODMAPs diet (almond)<br>40g/day for 20 days                                                                                                                        | Relief of IBS<br>symptoms                                   |
| Wilson,<br>(2020)                 | UK RCT,<br>Single-center       | 69<br>(55.2,34.1)  | Rome III,<br>65.3% IBS-D,<br>34.7% IBS-U                              | Low FODMAPs diet with placebo<br>for 4 weeks.                                                                                                                                               | Global symptom<br>question                                  |
| Goyal,<br>(2021)                  | India RCT,<br>Single-center    | 101<br>(58.1,42)   | Rome IV,<br>Subtype not<br>reported                                   | Low FODMAPs diet<br>Low FODMAPs diet (almond) for<br>4 weeks                                                                                                                                | Reduction of IBS-<br>SSS, reduction in<br>IBS-SSS $\geq$ 50 |
| <b>4. Bifidobacterium</b>         |                                |                    |                                                                       |                                                                                                                                                                                             |                                                             |
| Whorwell,<br>(2006)               | UK RCT,<br>Twenty-center       | 362<br>(100,41.9)  | Rome II,<br>55.5% IBS-D,<br>20.7% IBS-C,<br>23.8% IBS-M,              | <i>Bifidobacterium</i><br><i>BI</i> 35624 ( $1 \times 10^6$ live<br>bacteria/capsule, $1 \times 10^8$ live<br>bacteria/capsule, or $1 \times 10^{10}$ live<br>bacteria/capsule) for 4 weeks | Relief of overall IBS<br>symptoms                           |
| Agrawal,<br>(2009)                | UK RCT,<br>Single-center       | 38<br>(100,39.5)   | Rome III,<br>100% IBS-C                                               | <i>Bifidobacterium</i><br><i>BL</i> 'DN 173010 $1.25 \times 10^{10}$ cfu/pot<br>[ <i>ST</i> and <i>L. bulgaricus</i> ( $1.2 \times 10^9$<br>cfu/pot)] qd for 4 weeks                        | Global symptoms<br>score                                    |
| Guglielmetti,<br>(2011)           | Germany RCT,<br>Multi-center   | 122<br>(67.2,38.9) | Rome III,<br>21.3% IBS-D,<br>19.7% IBS-C,<br>59% IBS-M                | <i>Bifidobacterium</i><br><i>BB</i> MIMBb75<br>( $1 \times 10^9$ cfu/capsule) qd for 4 weeks                                                                                                | Relief of overall IBS<br>symptoms, adverse<br>events        |
| Charbonneau,<br>(2013)            | USA RCT,<br>Single-center      | 76<br>(81.7,45.1)  | Rome II,<br>Subtype not<br>reported                                   | <i>Bifidobacterium</i><br><i>BI</i> 35624 (109 cfu per capsule,<br>range $10^8$ – $10^{10}$ cfu/capsule) qd for<br>4 weeks                                                                  | The severity of<br>gastrointestinal<br>symptoms             |
| Pinto-Sanchez,<br>(2017)          | Canada RCT,<br>Single-center   | 44<br>(54,43.3)    | Rome III,<br>61.4% IBS-D,<br>38.6% IBS-M                              | <i>Bifidobacterium</i><br><i>BL</i> NCC3001 <i>subspecies longum</i><br>( $1.0E + 10$ cfu /1g ram powder with<br>maltodextrin) for 6 weeks.                                                 | AR of IBS symptoms                                          |
| Andresen,<br>(2020)               | Germany RCT,<br>Twenty-center  | 443<br>(69.5,41.4) | Rome III,<br>40% IBS-D,<br>24.1% IBS-C,<br>7.7% IBS-M,<br>28.2% IBS-U | <i>Bifidobacterium</i><br><i>BB</i> HIMIMBb75 ( $1 \times 10^9$<br>cells/capsule) qd for 8 weeks                                                                                            | AR of IBS symptoms,<br>adverse events                       |
| Lewis,<br>(2020)                  | Canada RCT,<br>Single-center   | 285<br>(77.7,42)   | Rome III,<br>15.1% IBS-D,<br>11.2% IBS-C,<br>73.7% IBS-M              | <i>Lactobacillus</i> / <i>Bifidobacterium</i><br><i>LP</i> HA-196 or <i>BL</i> R0175 ( $10 \times 10^9$<br>cfu/capsule) qd for 8 weeks.                                                     | IBS-SSS, adverse<br>events                                  |
| Martoni,<br>(2020)                | USA RCT,<br>Twelve-center      | 336<br>(49.5,39.5) | Rome III,<br>Subtype not<br>reported                                  | <i>Lactobacillus</i> / <i>Bifidobacterium</i><br><i>LA</i> ' DDS-1 or <i>BL</i> ' UABla-12<br>( $1 \times 10^{10}$ cfu/capsule) qd for 6<br>weeks                                           | Relief of IBS<br>symptoms score                             |
| <b>5. Saccharomyces</b>           |                                |                    |                                                                       |                                                                                                                                                                                             |                                                             |
| Choi,<br>(2011)                   | Korea RCT,<br>Three-center     | 90<br>(46,40.4)    | Rome II,<br>71.6 % IBS-D,<br>28.4% IBS-M                              | <i>Saccharomyces</i><br><i>Saccharomyces boulardii</i> ( $2 \times 10^{11}$<br>live cells/capsule) bid for 4 weeks                                                                          | Overall improvement<br>in IBS-QOL, adverse<br>events        |
| Abbas,<br>(2014)                  | Pakistan RCT,<br>Single-center | 72<br>(26.4,35.4)  | Rome II,<br>100 % IBS-D                                               | <i>Saccharomyces</i><br><i>Saccharomyces boulardii</i> 750<br>mg/day for 6 weeks (week 3–week<br>8).                                                                                        | Abdominal pain,<br>adverse events                           |
| Pineton de<br>Chambrun,<br>(2015) | France RCT,<br>Single-center   | 200<br>(86,44)     | Rome III,<br>28.5% IBS-D,<br>46.9% IBS-C,<br>24.6% IBS-M              | <i>Saccharomyces</i><br><i>Saccharomyces cerevisiae</i><br>CNCMI-3856 ( $4 \times 10^9$ cfu/capsule)<br>for 8 weeks                                                                         | Improvement of<br>abdominal pain,<br>adverse events         |

|                      |                                 |                    |                                                                       |                                                                                                                                                                |                                                                                             |
|----------------------|---------------------------------|--------------------|-----------------------------------------------------------------------|----------------------------------------------------------------------------------------------------------------------------------------------------------------|---------------------------------------------------------------------------------------------|
| Spiller,<br>(2016)   | UK RCT,<br>Single-center        | 379<br>(83.6,45.4) | Rome III,<br>20.8 % IBS-D,<br>47.5 % IBS-C,<br>31.7% IBS-M            | <i>Saccharomyces cerevisiae</i> I-3856 (1000mg, 8×10 <sup>9</sup> colony forming units cfu/g) qd for 12 weeks                                                  | Improvement of 50% of the weekly average "intestinal pain/discomfort score", adverse events |
| Gayathri,<br>(2020)  | India RCT,<br>Single-center     | 100<br>(34,41)     | Rome III,<br>65 % IBS-D,<br>24 % IBS-C,<br>11% IBS-M                  | <i>Saccharomyces cerevisiae</i> Standard treatment for 2 weeks then <i>Saccharomyces cerevisiae</i> CNCMI-3856 (2×10 <sup>9</sup> cfu/capsule) bid for 8 weeks | Abdominal pain score, adverse events                                                        |
| 6. <i>Bacillus</i>   |                                 |                    |                                                                       |                                                                                                                                                                |                                                                                             |
| Hun,<br>(2009)       | USA RCT,<br>Single-center       | 50<br>(82.0,48.0)  | Rome II,<br>100 % IBS-D                                               | <i>Bacillus coagulans</i> GBI-30, 6086 qd for 8 weeks                                                                                                          | The severity of IBS symptoms                                                                |
| Rogha,<br>(2014)     | Iran RCT,<br>Single-center      | 85<br>(78.6,39.8)  | Rome III,<br>32 % IBS-D,<br>12.5 % IBS-C,<br>50% IBS-M,<br>5.4% IBS-U | <i>Bacillus Coagulans</i> (15 × 10 <sup>7</sup> Spores) and Fructo-oligosaccharides (100 mg) tid for 12 consecutive weeks                                      | The severity of gastrointestinal symptoms                                                   |
| Catinean,<br>(2019)  | Romania RCT,<br>Single-center   | 90<br>(60,39.4)    | Rome III,<br>100 % IBS-D                                              | <i>Bacillus spp</i> qd for 1 week then bid for 24 days                                                                                                         | IBS-SSS                                                                                     |
| Madempudi,<br>(2020) | India RCT,<br>Single-center     | 136<br>(27.8,43.4) | Rome III,<br>IBS-D,<br>IBS-C,<br>IBS-M,<br>IBS-U                      | <i>Bacillus coagulant Unique</i> IS2 (2 billion cfu/capsule) qd for 8 weeks                                                                                    | Relief of abdominal pain, satisfactory relief of IBS symptoms                               |
| 7. Another           |                                 |                    |                                                                       |                                                                                                                                                                |                                                                                             |
| Enck,<br>(2009)      | Germany RCT,<br>Twelve-center   | 298<br>(49.3,49.6) | Others,<br>IBS-D,<br>IBS-C,<br>IBS-M                                  | <i>Escherichia coli E. coli</i> DSM1 7252 (1.5-4.5×10 <sup>7</sup> cfu/ml) 0.75ml drops tid for 1 week, then 1.5ml tid for weeks 2-8                           | AR of IBS core symptoms, adverse events                                                     |
| Kruis,<br>(2012)     | Germany RCT,<br>Single-center   | 120<br>(76.7,45.7) | Rome II,<br>45% IBS-D,<br>29.2% IBS-C,<br>25.8% IBS-M/U               | <i>Escherichia coli E. coli</i> Nissle 1917 (2.5-25×10 <sup>9</sup> cfu/capsule) for 4 days then bid for 12 weeks                                              | Clinical response (patients reported satisfied in treatment), adverse events                |
| Gade,<br>(1989)      | Denmark RCT,<br>Thirteen-center | 54<br>(77.8,34)    | Others,<br>IBS-D,<br>IBS-C                                            | <i>Enterococcus S. faecium</i> , 4 tablets bid for 4 weeks                                                                                                     | Improvement in IBS symptoms                                                                 |

Abbreviations: RCT, randomized controlled trial. IBS, irritable bowel syndrome. IBS-C, constipation-predominant irritable bowel syndrome. IBS-D, diarrhea-predominant irritable bowel syndrome. IBS-M, mixed irritable bowel syndrome. IBS-U, un-subtyped irritable bowel syndrome. FODMAPs, fermentable oligosaccharides, disaccharides, monosaccharides, and polyols. IBS-SSS, irritable bowel syndrome symptom severity score. IBS-QOL, evaluation of the irritable bowel syndrome quality of life. GSRS, gastrointestinal symptom rating scale. MSS, mean symptom score. SR, satisfactory relief. AR, adequate relief. USA, United States of America. UK, United Kingdom. *L*, *Lactobacillus*. *B*, *Bifidobacterium*. *S*, *Streptococcus*. VSL#3, *Bifidobacterium longum* (BL), *Bifidobacterium infantis* (BI), *Bifidobacterium breve*, *Lactobacillus acidophilus* (LA'), *Lactobacillus casei* (LC), *Lactobacillus delbrueckii ssp, Bulgaricus*, *Lactobacillus plantarum* (LP'), *Streptococcus salivarius ssp, thermophiles*. LcS, *Lactobacillus casei Shirota*. LGG, *Lactobacillus rhamnosus GG*. LP, *Lactobacillus paracasei*. LR, *Lactobacillus rhamnosus*. BB, *Bifidobacterium bifidum*. BL', *Bifidobacterium lactis*. ST, *Streptococcus thermophilus*.
